# Supplementary material for: On the in silico and in vitro anticancer activity of sulfonamide chalcones: potential JNKK3 inhibitors
Source: Royal Society of Chemistry journal article supplement (doi:10.1039/c9nj05612b), 2020-01-01
Supplement: c9nj05612b1.pdf [file c9nj05612b1.pdf]

**Table S1.** Top-7 (those with better Fit Score) human proteins found for compounds I-VIII

| Rank       | PDB ID | Target Name                                          | Number of Features | Fit Score | Normalized Fit Score | z'-score |
|------------|--------|------------------------------------------------------|--------------------|-----------|----------------------|----------|
| <b>I</b>   |        |                                                      |                    |           |                      |          |
| 1          | 1F86   | Transthyretin                                        | 3                  | 2.984     | 0.9947               | 0.77242  |
| 2          | 3DEJ   | Caspase-3                                            | 3                  | 2.977     | 0.9922               | 0.91843  |
| 3          | 1PQ9   | Oxysterols receptor LXR-beta                         | 3                  | 2.97      | 0.9901               | 0.83174  |
| 4          | 2VWU   | Ephrin type-B receptor 4                             | 3                  | 2.968     | 0.9892               | 0.88698  |
| 5          | 1VEC   | Probable ATP-dependent RNA helicase DDX6             | 3                  | 2.957     | 0.9857               | 0.92884  |
| 6          | 1UDU   | cGMP-specific 3,5-cyclic phosphodiesterase           | 3                  | 2.953     | 0.9842               | 0.84906  |
| 7          | 1PMV   | Mitogen-activated protein kinase 10                  | 3                  | 2.951     | 0.9837               | 0.53892  |
| <b>II</b>  |        |                                                      |                    |           |                      |          |
| 1          | 2AGT   | Aldose reductase                                     | 3                  | 2.992     | 0.9974               | 0.84748  |
| 2          | 1BM6   | Stromelysin-1                                        | 3                  | 2.978     | 0.9927               | 0.58522  |
| 3          | 1LBK   | Glutathione S-transferase P                          | 3                  | 2.974     | 0.9913               | 0.6646   |
| 4          | 1PQ9   | Oxysterols receptor LXR-beta                         | 3                  | 2.968     | 0.9894               | 0.68102  |
| 5          | 1UNH   | Cyclin-dependent kinase 5 activator 1                | 3                  | 2.964     | 0.988                | 0.76718  |
| 6          | 1PMV   | Mitogen-activated protein kinase 10                  | 3                  | 2.961     | 0.9868               | 0.35032  |
| 7          | 1PME   | Mitogen-activated protein kinase 1                   | 3                  | 2.959     | 0.9863               | 0.57058  |
| <b>III</b> |        |                                                      |                    |           |                      |          |
| 1          | 1LBK   | Glutathione S-transferase P                          | 3                  | 2.987     | 0.9956               | 0.76515  |
| 2          | 1DVZ   | Transthyretin                                        | 3                  | 2.986     | 0.9954               | 0.74064  |
| 3          | 3DEJ   | Caspase-3                                            | 3                  | 2.982     | 0.9939               | 0.82835  |
| 4          | 2C3I   | Proto-oncogene serine/threonine-protein kinase Pim-1 | 3                  | 2.979     | 0.993                | 0.76856  |
| 5          | 1UDU   | cGMP-specific 3,5-cyclic phosphodiesterase           | 3                  | 2.979     | 0.9929               | 0.81934  |
| 6          | 1VEC   | Probable ATP-dependent RNA helicase DDX6             | 3                  | 2.978     | 0.9925               | 0.88084  |
| 7          | 1PMV   | Mitogen-activated protein kinase 10                  | 3                  | 2.974     | 0.9912               | 0.47884  |
| <b>IV</b>  |        |                                                      |                    |           |                      |          |
| 1          | 1VEC   | Probable ATP-dependent RNA helicase DDX6             | 3                  | 2.971     | 0.9904               | 0.92058  |
| 2          | 2UYI   | Kinesin-like protein KIF11                           | 3                  | 2.971     | 0.9903               | 0.86973  |
| 3          | 1PMV   | Mitogen-activated protein kinase 10                  | 3                  | 2.97      | 0.9898               | 0.54878  |
| 4          | 1PQ9   | Oxysterols receptor LXR-beta                         | 3                  | 2.968     | 0.9894               | 0.78082  |
| 5          | 1DVZ   | Transthyretin                                        | 3                  | 2.961     | 0.987                | 0.72532  |

|             |             |                                                  |   |       |        |         |
|-------------|-------------|--------------------------------------------------|---|-------|--------|---------|
| <b>6</b>    | <b>1UDU</b> | cGMP-specific 3,5-cyclic phosphodiesterase       | 3 | 2.927 | 0.9755 | 0.7342  |
| <b>7</b>    | <b>1UKI</b> | Mitogen-activated protein kinase 8               | 3 | 2.919 | 0.9728 | 0.52367 |
| <b>V</b>    |             |                                                  |   |       |        |         |
| <b>1</b>    | <b>1PMV</b> | Mitogen-activated protein kinase 10              | 3 | 2.979 | 0.9931 | 0.45302 |
| <b>2</b>    | <b>1DVZ</b> | Transthyretin                                    | 3 | 2.978 | 0.9927 | 0.67553 |
| <b>3</b>    | <b>1PQ9</b> | Oxysterols receptor LXR-beta                     | 3 | 2.971 | 0.9903 | 0.70581 |
| <b>4</b>    | <b>1W8M</b> | Peptidyl-prolyl cis-trans isomerase A            | 3 | 2.966 | 0.9888 | 0.67479 |
| <b>5</b>    | <b>1BM6</b> | Stromelysin-1                                    | 3 | 2.964 | 0.9881 | 0.56266 |
| <b>6</b>    | <b>1UKI</b> | Mitogen-activated protein kinase 8               | 3 | 2.952 | 0.9841 | 0.5335  |
| <b>7</b>    | <b>1VEC</b> | Probable ATP-dependent RNA helicase DDX6         | 3 | 2.938 | 0.9794 | 0.73317 |
| <b>VI</b>   |             |                                                  |   |       |        |         |
| <b>1</b>    | <b>1F86</b> | Transthyretin                                    | 3 | 2.987 | 0.9955 | 0.59933 |
| <b>2</b>    | <b>1W7H</b> | Mitogen-activated protein kinase 14              | 3 | 2.982 | 0.994  | 0.8043  |
| <b>3</b>    | <b>1PMV</b> | Mitogen-activated protein kinase 10              | 3 | 2.972 | 0.9907 | 0.44316 |
| <b>4</b>    | <b>1PQ9</b> | Oxysterols receptor LXR-beta                     | 3 | 2.971 | 0.9905 | 0.71801 |
| <b>5</b>    | <b>1VEC</b> | Probable ATP-dependent RNA helicase DDX6         | 3 | 2.966 | 0.9888 | 0.82767 |
| <b>6</b>    | <b>1SMD</b> | Alpha-amylase 1                                  | 3 | 2.955 | 0.9851 | 0.84318 |
| <b>7</b>    | <b>1UKI</b> | Mitogen-activated protein kinase 8               | 3 | 2.943 | 0.9811 | 0.51972 |
| <b>VII</b>  |             |                                                  |   |       |        |         |
| <b>1</b>    | <b>1BM6</b> | Stromelysin-1                                    | 3 | 2.989 | 0.9962 | 0.81483 |
| <b>2</b>    | <b>1PQ9</b> | Oxysterols receptor LXR-beta                     | 3 | 2.969 | 0.9897 | 0.84838 |
| <b>3</b>    | <b>1PMV</b> | Mitogen-activated protein kinase 10              | 3 | 2.946 | 0.9819 | 0.54626 |
| <b>4</b>    | <b>2NMX</b> | Carbonic anhydrase 1                             | 3 | 2.942 | 0.9806 | 0.83863 |
| <b>5</b>    | <b>1SMD</b> | Alpha-amylase 1                                  | 3 | 2.932 | 0.9773 | 0.90627 |
| <b>6</b>    | <b>1UKI</b> | Mitogen-activated protein kinase 8               | 3 | 2.924 | 0.9746 | 0.61508 |
| <b>7</b>    | <b>1W8M</b> | Peptidyl-prolyl cis-trans isomerase A            | 3 | 2.923 | 0.9743 | 0.70825 |
| <b>VIII</b> |             |                                                  |   |       |        |         |
| <b>1</b>    | <b>2F6T</b> | Tyrosine-protein phosphatase non-receptor type 1 | 3 | 2.994 | 0.998  | 0.79482 |
| <b>2</b>    | <b>1VEC</b> | Probable ATP-dependent RNA helicase DDX6         | 3 | 2.98  | 0.9932 | 0.82852 |
| <b>3</b>    | <b>1PMV</b> | Mitogen-activated protein kinase 10              | 3 | 2.976 | 0.9921 | 0.40405 |
| <b>4</b>    | <b>1PQ9</b> | Oxysterols receptor LXR-beta                     | 3 | 2.972 | 0.9907 | 0.687   |
| <b>5</b>    | <b>2JBP</b> | MAP kinase-activated protein kinase 2            | 3 | 2.961 | 0.9871 | 0.52817 |

|          |             |                                    |   |       |        |         |
|----------|-------------|------------------------------------|---|-------|--------|---------|
| <b>6</b> | <b>1UKI</b> | Mitogen-activated protein kinase 8 | 3 | 2.949 | 0.983  | 0.50611 |
| <b>7</b> | <b>2Q08</b> | Carbonic anhydrase 2               | 3 | 2.948 | 0.9827 | 0.69319 |
